# Supplementary material
Source: PubMed Central journal article supplement (PMC7350989)
Supplement: ASN.2020040470SupplementaryData.pdf [file ASN.2020040470SupplementaryData.pdf]

## **Supplemental Material**

**Supplemental Table 1.** Characteristics and presentation of patients with end-stage kidney disease and COVID-19 admitted to a single center in New York City, by mechanical ventilation status.

**Supplemental Table 2.** Laboratory results of patients with end-stage kidney disease and COVID-19 admitted to a single center in New York City, by vital status.

**Supplemental Table 1.** Characteristics and presentation of patients with end-stage kidney disease and COVID-19 admitted to a single center in New York City, by mechanical ventilation status.

|                                                 | No Mechanical Ventilation<br>n=40 (68%) | Mechanical Ventilation<br>n=8 (14%) | Died with "Do Not Intubate"<br>Advanced Directive<br>n=11 (19%) |
|-------------------------------------------------|-----------------------------------------|-------------------------------------|-----------------------------------------------------------------|
| <i>Demographics on Admission</i>                |                                         |                                     |                                                                 |
| Age, years                                      | 62 (54-73)                              | 65 (58-79)                          | 81 (62-82)                                                      |
| Male                                            | 24 (60)                                 | 2 (25)                              | 7 (64)                                                          |
| Race                                            |                                         |                                     |                                                                 |
| White/Caucasian                                 | 7 (18)                                  | 2 (25)                              | 2 (18)                                                          |
| Black/African American                          | 10 (25)                                 | 3 (38)                              | 2 (18)                                                          |
| Other/No Answer                                 | 23 (58)                                 | 3 (38)                              | 7 (64)                                                          |
| Hispanic ethnicity                              | 31 (78)                                 | 3 (38)                              | 10 (91)                                                         |
| Charlson comorbidity index                      | 7 (5-8)                                 | 6 (6-8)                             | 8 (6-12)                                                        |
| Body mass index, kg/m <sup>2</sup> (n=57)       | 25.0 (22.4-30.5)                        | 28.8 (27.9-32.5)                    | 26.1 (19.0-28.6)                                                |
| Body mass index >= 25 (n=57)                    | 20 (50)                                 | 6/7 (86)                            | 5/10 (50)                                                       |
| Hypertension                                    | 40 (100)                                | 8 (100)                             | 10 (91)                                                         |
| Diabetes                                        | 29 (73)                                 | 5 (63)                              | 7 (64)                                                          |
| Coronary artery disease                         | 18 (45)                                 | 3 (38)                              | 6 (55)                                                          |
| Pulmonary disease                               | 6 (15)                                  | 2 (25)                              | 2 (18)                                                          |
| Smoker                                          |                                         |                                     |                                                                 |
| Current                                         | 1 (3)                                   | 1 (13)                              | 0 (0)                                                           |
| Former                                          | 10 (25)                                 | 4 (50)                              | 3 (27)                                                          |
| Prior kidney transplant                         | 4 (10)                                  | 1 (13)                              | 0 (0)                                                           |
| ACEi or ARB use                                 | 9 (23)                                  | 2 (25)                              | 2 (18)                                                          |
| Statin use                                      | 29 (73)                                 | 5 (63)                              | 9 (82)                                                          |
| Dialysis Access                                 |                                         |                                     |                                                                 |
| AVF/AVG                                         | 33 (83)                                 | 4 (50)                              | 10 (91)                                                         |
| Dialysis catheter                               | 5 (13)                                  | 4 (50)                              | 1 (9)                                                           |
| Peritoneal dialysis                             | 2 (5)                                   | 0 (0)                               | 0 (0)                                                           |
| <i>COVID-19 Presentation</i>                    |                                         |                                     |                                                                 |
| Symptom onset to admission, days (n=48)*        | 3 (2-4)                                 | 3 (2-7)                             | 4 (2-5)                                                         |
| Admitted after extended dialysis break (n=57)** | 7 (18)                                  | 1/8 (13)                            | 1 (9)                                                           |
| Presenting symptoms                             |                                         |                                     |                                                                 |
| Fever                                           | 20 (50)                                 | 4 (50)                              | 5 (45)                                                          |
| Cough                                           | 16 (40)                                 | 4 (50)                              | 3 (27)                                                          |
| Dyspnea (exertional or rest)                    | 14 (35)                                 | 2 (25)                              | 5 (45)                                                          |
| Fatigue/malaise                                 | 9 (23)                                  | 1 (13)                              | 3 (27)                                                          |
| Gastrointestinal                                | 6 (15)                                  | 0 (0)                               | 3 (27)                                                          |
| Chills                                          | 5 (13)                                  | 1 (13)                              | 0 (0)                                                           |
| Myalgia                                         | 3 (8)                                   | 1 (13)                              | 0 (0)                                                           |
| Altered mentation                               | 3 (8)                                   | 2 (25)                              | 0 (0)                                                           |
| None of the above symptoms                      | 1 (3)                                   | 1 (13)                              | 1 (9)                                                           |
| Predominant initial CXR findings                |                                         |                                     |                                                                 |
| Multifocal/bilateral opacities                  | 26 (65)                                 | 4 (50)                              | 5 (45)                                                          |
| No acute findings                               | 7 (18)                                  | 3 (38)                              | 1 (9)                                                           |
| Unilateral opacity                              | 3 (8)                                   | 1 (13)                              | 2 (18)                                                          |
| Pleural effusion                                | 1 (3)                                   | 0 (0)                               | 3 (27)                                                          |
| Pulmonary edema                                 | 3 (8)                                   | 0 (0)                               | 0 (0)                                                           |

Abbreviations: ACEi- angiotensin converting enzyme inhibitor; ARB- angiotensin receptor blocker.

\*9 patient records were missing this data or patient was unsure | \*\*2 patients on PD not included

**Supplemental Table 2.** Laboratory results of patients with end-stage kidney disease and COVID-19 admitted to a single center in New York City, by vital status

| <i>median (IQR)</i>                          | <b>All<br/>n=59</b> | <b>Still Living<br/>n=41 (69%)</b> | <b>Deceased<br/>n=18 (31%)</b> | <b>p</b> |
|----------------------------------------------|---------------------|------------------------------------|--------------------------------|----------|
| <i>Admission Labs*</i>                       |                     |                                    |                                |          |
| White blood cell count, x1000/ $\mu$ l       | 6.0 (4.5-7.8)       | 5.7 (4.0-7.5)                      | 7.5 (5.3-9.9)                  | 0.04     |
| Absolute lymphocyte count                    | 800 (580-1230)      | 860 (570-1215)                     | 745 (590-1403)                 | 0.71     |
| Ferritin, ng/mL (n=46)                       | 2254 (1246-3505)    | 1611 (1119-3128)                   | 2822 (1547-7592)               | 0.11     |
| Lactate dehydrogenase, U/L (n=45)            | 349 (256-519)       | 312 (247-466)                      | 507 (279-663)                  | 0.04     |
| Procalcitonin, ng/mL (n=45)                  | 1.71 (0.81-3.39)    | 1.71 (0.72-3.05)                   | 2.04 (1.28-13.82)              | 0.25     |
| Erythrocyte sedimentation rate, mm/hr (n=41) | 76 (43-107)         | 78 (42-109)                        | 75 (41-105)                    | 0.95     |
| C-reactive protein, mg/L (n=47)              | 86.5 (26.1-168.6)   | 80.3 (19.6-116.0)                  | 163 (78.1-298.0)               | 0.01     |
| Interleukin-6, pg/mL (n=26)                  | 9 (4-61)            | 9 (4-61)                           | 6 (<5-32)                      | 0.05     |
| D-dimer, mg/L (n=45)                         | 1.66 (0.84-3.24)    | 1.69 (0.84-2.49)                   | 1.56 (1.24-4.14)               | 0.36     |
| Hemoglobin                                   | 10.6 (9.7-11.8)     | 10.9 (10.0-12.2)                   | 9.9 (9.1-11.2)                 | 0.03     |
| <i>Peak Values*</i>                          |                     |                                    |                                |          |
| White blood cell count, x1000/ $\mu$ l       | 7.8 (6.0-11.9)      | 7.4 (5.6-8.6)                      | 13 (9.2-18)                    | <0.001   |
| Ferritin, ng/mL (n=54)                       | 3044 (2104-5982)    | 2576 (1557-3837)                   | 5877 (3077-8511)               | <0.001   |
| Lactate dehydrogenase, U/L                   | 395 (285-615)       | 348 (266-533)                      | 559 (338-851)                  | 0.02     |
| Procalcitonin, ng/mL (n=54)                  | 3.08 (1.14-12.79)   | 1.99 (0.98-4.50)                   | 15.4 (3.11-33.83)              | <0.001   |
| Erythrocyte sedimentation rate, mm/hr (n=51) | 91 (74-121)         | 91 (62-123)                        | 88 (75-123)                    | 0.82     |
| C-reactive protein, mg/L (n=56)              | 152.5 (41.4-288.8)  | 110.7 (25.7-198.7)                 | 288.7 (153.3-301.0)            | 0.003    |
| Interleukin-6, pg/mL (n=34)                  | 24 (6-74)           | 14 (6-54)                          | 60 (24-267)                    | 0.03     |
| D-dimer, mg/L (n=51)                         | 2.47 (1.24-4.10)    | 1.91 (1.17-3.65)                   | 4.02 (1.59-5.38)               | 0.03     |

\*n<59 due to labs not performed
